# Supplementary material for: Influence of Placental Abnormalities and Pregnancy-Induced Hypertension in Prematurity Associated with Various Assisted Reproductive Technology Techniques
Source: PubMed Central journal article supplement (PMC8070757; doi:10.3390/jcm10081681), 2021-04-14
Supplement: jcm-10-01681-s001.pdf [file jcm-10-01681-s001.pdf]

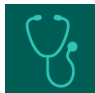

Article

# Supplementary Material: Influence of Placental Abnormalities and Pregnancy-Induced Hypertension in Prematurity Associated with Various Assisted Reproductive Technology Techniques

Judy E. Stern, Chia-ling Liu, Sunah S. Hwang, Dmitry Dukhovny, Leslie V. Farland, Hafsatou Diop, Charles C. Coddington and Howard Cabral

**Table S1.** ICD 9 and 10 codes for maternal conditions, pregnancy risks and delivery complications.

| Categories                           | Conditions                              | ICD-9 Code                                            | ICD-10 Code                                           |
|--------------------------------------|-----------------------------------------|-------------------------------------------------------|-------------------------------------------------------|
| Maternal Conditions                  |                                         |                                                       |                                                       |
|                                      | Chronic diabetes                        | 648.0, 250                                            | E08, E09, E10, E11, E13<br>O24.0, O24.1, O24.3, O24.8 |
|                                      | Chronic Hypertension                    | 401, 402, 403, 404, 405<br>642.0, 642.1, 642.2, 642.7 | I10, I11, I12, I13, I14, I15, I16<br>O10, O11         |
| Pregnancy Risks                      |                                         |                                                       |                                                       |
| Pregnancy Induced Hypertension (PIH) | Pregnancy Hypertension                  | 642.3, 642.9                                          | O13, O16                                              |
|                                      | Preeclampsia/Eclampsia                  | 6424, 6425, 6426                                      | O11, O14, O15                                         |
|                                      | Gestational Diabetes                    | 6488                                                  | O24.4, O24.9                                          |
|                                      | Uterine Bleeding                        | 6413, 6418, 6419                                      | O46, O67                                              |
| Delivery Complications               |                                         |                                                       |                                                       |
| Placental abnormalities              | Abruptio placentae                      | 641.2, 762.1                                          | O45, P02.1                                            |
|                                      | Placenta previa                         | 641.0, 641.1                                          | O44                                                   |
|                                      | Vasa Previa                             | 663.5                                                 | O69.4                                                 |
|                                      | Placenta accreta                        | 667.0                                                 | O43.21                                                |
|                                      | Rupture membrane premature (< 12 hours) | 658.1, 761.1                                          | P01.1                                                 |
|                                      | Rupture membrane prolonged (> 24 hours) | 658.2, 658.3                                          | O42.1                                                 |
